# Supplementary material for: Eomes function is conserved between zebrafish and mouse and controls left-right organiser progenitor gene expression via interlocking feedforward loops
Source: Front Cell Dev Biol. 2022 Aug 25;10:982477. doi: 10.3389/fcell.2022.982477 (PMC9483813; doi:10.3389/fcell.2022.982477)
Supplement: Supplementary file 1 [file DataSheet3.XLSX]

## Sheet: WagnerClusterIntersect
Table S2. Overlap between UMAP cluster markers assigned by this study and cell type markers from Wagner et al. (2018).
For consistency with the original source publication of the 6 h.p.f. scRNA-seq data we cross-referenced the marker genes for each cluster in the present study with the clusters defined by Wagner et al. (2018).
Significant positive markers in each of the 14 clusters defined by our analyses in Seurat were overlapped with the top 20 markers for each identity defined by Wagner et al. (2018).
Cell identities were then assigned based on maximum concordance with markers defined by Wagner et al. Cluster identities and overlapping markers between the two studies are reported in the table.
Cluster#	Talbot.Cluster.Identity	Wagner.ClusterName	GeneOverlaps	GeneOverlaps	GeneOverlaps	GeneOverlaps	GeneOverlaps	GeneOverlaps	GeneOverlaps	GeneOverlaps	GeneOverlaps	GeneOverlaps	GeneOverlaps	GeneOverlaps	GeneOverlaps	GeneOverlaps	GeneOverlaps	GeneOverlaps	GeneOverlaps	GeneOverlaps	GeneOverlaps	GeneOverlaps
1	Ectoderm-ventral	06hpf-ectoderm - ventral	gata2a	klf2b	tfap2c	tfap2a	foxi1	rgcc	id1	crabp2b	bambia
2	Ectodorsal-dorsal #1	06hpf-ectoderm - dorsal	sox3	snai2	fam212aa	sox2
3	Ectodorsal-dorsal #2	06hpf-ectoderm - dorsal	her3	sox2	her8a	alcamb	lhx5	midn	sox3
4	Non-dorsal margin	06hpf-non-dorsal margin	tbxta	cdx4	dld	hes6	eve1	sebox	nrarpa	prickle1b	znf703	rasgef1ba	ved	szl
5	Ectodorsal-dorsal #3	06hpf-ectoderm - dorsal	her3	lfng	lhx5	snai2	alcamb	sox3	sox2
6	Non-dorsal margin involuted (including presumptive endoderm)	06hpf-non-dorsal involuted anterior	flrt3	gata5	snai1a	si:dkey-261j4.4	drl	plekhn1	lhx1a	LOC100006216	pitx2	LOC100334652	rnd1l	gid8b	sp5a	id3
7	Dorsal margin	06hpf-dorsal margin	rasgef1ba	lmo4a
8	Dorsal margin involuted	06hpf-dorsal margin involuted	foxa3	gsc	noto	xbp1	admp	fgf8a	ntd5	lhx1a	cst3	LOC100006216	LOC100334652	LOC557268	cyp27c1	net1	tbxta	epha2a	cdkn1ca	cdkn1c	prickle1b	serpinh1b
9	Endoderm & DFCs	06hpf-non-dorsal involuted anterior	sox32	s1pr5a	ackr3b	gata5	pitx2	plekhn1	flrt3	rnd1l	drl	si:dkey-261j4.4	snai1a	cxcr4a	sp5a	lhx1a	id3	gatsl2	LOC100006216	gid8b	LOC100334652	vgll4l
10	EVL #1	06hpf-EVL	lye	krt18	si:ch211-125o16.4
11	Apoptotic like	06hpf-apoptotic-like	phlda3	isg15	LOC100535455	LOC101885512	foxo3b	si:dkey-204l11.1	casp8	grasp	LOC555795	igf2a	mdm2	zgc:136826	bbc3	sesn3	LOC100330598	ccng1	gtpbp1l	snx11	tp53	baxa
12	Ectodorsal-dorsal #4	06hpf-ectoderm - dorsal	snai2	sox2	sox3	alcamb
13	EVL #2	06hpf-EVL	zgc:193505	si:dkey-152p16.6	krt97	si:ch211-95j8.2	mid1ip1a	LOC100537803	si:ch211-217k17.9	cebpb	lcp1	zgc:153665	si:ch211-125o16.4	krt4	krt5	cldne	krt8	lye	krt18	elovl1a	elovl7b	hsd17b12a
14	Germline	06hpf-germline	nanos3	dnd1	ca15b	tdrd7a	si:ch73-93k15.2	si:ch211-241j12.3	dazl	si:rp71-45k5.2	ddx4	LOC796580	LOC796453	gra	pfn2	ctssb.1	lysmd3	wee2	h1m	slc16a3	mapre1a	tbp
