# Supplementary material for: Eomes function is conserved between zebrafish and mouse and controls left-right organiser progenitor gene expression via interlocking feedforward loops
Source: Front Cell Dev Biol. 2022 Aug 25;10:982477. doi: 10.3389/fcell.2022.982477 (PMC9483813; doi:10.3389/fcell.2022.982477)
Supplement: Supplementary file 3 [file DataSheet2.XLSX]

## Sheet: Sheet1
Table S1. Sequence reads aligned to the mm10 mouse genome shown in Figure S1C
RT-PCR Product	Sanger sequence read
Figure S1C RT-PCR product 1	GNANNNCNTCNGGACAGGGTCTCATGTGATCAAACTCAAACCNTNNTCTGTAGCTCCAATGACCTTTCACCTCTGACCTCCAGCTTCCACCTCCCCAGTACCGGGATTACAGGCCTCGGCCACCTCTGATTTATGTTGAGCTTCAGAGAGACACCCAGGCCTGTCTGTGTCAATGCTGTTGAGGCTCGCCTTCGACCCCATGATATAGCCACAGATCCCAGTTTCCCANAGGAAATATCTGACCCCTGGAGGAAGTGTCCTCTTAAGGGGTGGGGAATCCACTCTGTTCTCACAGTCGGCAGCACAACTCTCTAGCTTCTGGGAGGCAGCTTGTTTGGGGACAACGTGAGGGTTGGTGTAAAAATATAAGAGGCGGTGTATATAATGTCCCATGTACAC…
Figure S1C RT-PCR product 2	TTCGCCCTTCGGGAGAAGTTTTGAACGCCGTACCGACCTCCAGGGACAATCTGATGGGATCGAGGGGAATCCGTCGGACTTGGCGTTAACCTGTCGTTTTCTGAAGCCGTGTACATGCTTTGATCCCAGCTTTCGGGGGCAGAGGCAGATGGATCTGAGTTCTAGGCCATCCTGGTCTACAGAGAGAGTTCCAGGACAGCCAGGGCTACACACCTGAAGTTCTCAGGATCCACGTGCAAGGGCGAATTCGCGGCCGCTAAATTCAATTCGCCCTATAGTGAGTCGTATTACAATTCACTGGCCGTCGTTTTACAACGTCGTGACTGGGAAAACCCTGGCGTTACCCAACTTAATCGCCTTGCAGCACATCCCCCTTTCGCCAGCTGGCGTAATAGCGAA…
Figure S1C RT-PCR product 3	TAACGATTCGCCCTTGCACGTGGATCCTGAGAACTTCAGGTTTTGAGTCATTGTTTATCCATGTTGAGTCAGTGTGTAGCCCTGGCTGTCCTGGAACTCTCTCTGTAGACCAGGATGGCCTAGAACTCAGATCCACCTGCCTCTGCCCCCGAAAGCTGGGATCAAAGATCCCATCAGATTGTCCCTGGAGGTCGGTACGGCGTTCAAAACTTCTTCCCGAAGGGCGAATTCGCGGCCGCTAAATTCAATTCGCCCTATAGTGAGTCGTATTACAATTCACTGGCCGTCGTTTTACAACGTCGTGACTGGGAAAACCCTGGCGTTACCCAACTTAATCGCCTTGCAGCACATCCCCCTTTCGCCAGCTGGCGTAATAGCGAAGAGGCCCGCACCGATCGC…
Figure S1C RT-PCR product 4	NTGCACGTGGATCCNGAGAACTTCAGGCATGTACACGGCTTCAGAAAATGACAGGTTAACTCCATCTCCCACGGATTCCCCTAGATCCCATCAAATTGTCCCTGGAGGTCGGTACGGCGTTCAAAACTTCTTCCCGAAGGGCGAATTCGCGGCCGCTAAATTCAATTCGCCCTATAGTGAGTCGTATTACAATTCACTGGCCGTCGTTTTACAACGTCGTGACTGGGAAAACCCTGGCGTTACCCAACTTAATCGCCTTGCAGCACATCCCCCTTTCGCCAGCTGGCGTAATAGCGAAGAGGCCCGCACCGATCGCCCTTCCCAACAGTTGCGCAGCCTATACGTACGGCAGTTTAAGGTTTACACCTATAAAAGAGAGAGCCGTTATCGTCTGTTTGT…
Figure S1C RT-PCR product 5	NNANTCGCCCTTGCACGTGGATCCTGAGAACTTCAGGATCCCATCAGATTGTCCCTGGAGGTCGGTACGGCGTTCAAAACTTCTTCCCGAAGGGCGAATTCGCGGCCGCTAAATTCAATTCGCCCTATAGTGAGTCGTATTACAATTCACTGGCCGTCGTTTTACAACGTCGTGACTGGGAAAACCCTGGCGTTACCCAACTTAATCGCCTTGCAGCACATCCCCCTTTCGCCAGCTGGCGTAATAGCGAAGAGGCCCGCACCGATCGCCCTTCCCAACAGTTGCGCAGCCTATACGTACGGCAGTTTAAGGTTTACACCTATAAAAGAGAGAGCCGTTATCGTCTGTTTGTGGATGTACAGAGTGATATTATTGACACGCCGGGGCGACGGATGGTGA…
